# Supplementary material
Source: PubMed Central journal article supplement (PMC3524886)
Supplement: 97320630081042S1.pdf [file 97320630081042S1.pdf]

## Supplementary material:

**Table 1:** Physico-chemical characterization three Methylophilic strain

| Organism                          | Accession number | M.F.                                                                                 | M.W.  | p.I. | -R | +R | EC    | II    | AI    | GRAVY  |
|-----------------------------------|------------------|--------------------------------------------------------------------------------------|-------|------|----|----|-------|-------|-------|--------|
| <i>Methylosinus trichosporium</i> | CAI30806.1       | C <sub>929</sub> H <sub>1375</sub> N <sub>249</sub> O <sub>281</sub> S <sub>8</sub>  | 20.78 | 5.13 | 28 | 19 | 33920 | 16.74 | 57.62 | -0.812 |
| <i>Hyphomicrobium zavarzinii</i>  | CAA69318.1       | C <sub>913</sub> H <sub>1359</sub> N <sub>253</sub> O <sub>276</sub> S <sub>8</sub>  | 20.55 | 5.78 | 26 | 21 | 55920 | 22.65 | 51.73 | -0.970 |
| <i>Methylobacterium podarium</i>  | AAR88789.1       | C <sub>924</sub> H <sub>1397</sub> N <sub>253</sub> O <sub>280</sub> S <sub>12</sub> | 20.92 | 5.46 | 27 | 21 | 46410 | 27.18 | 56.20 | -0.728 |

**Table 2:** Secondary Structure Analysis of three Methylophilic strain

| Organisms                         | Accession no. | Alpha Helix | Strand | Random coil |
|-----------------------------------|---------------|-------------|--------|-------------|
| <i>Methylosinus trichosporium</i> | CAI30806.1    | 00          | 55     | 126         |
| <i>Hyphomicrobium zavarzinii</i>  | CAA69318.1    | 00          | 52     | 132         |
| <i>Methylobacterium podarium</i>  | AAR88789.1    | 00          | 57     | 122         |

**Table 3:** 3-D Model Analysis of Methylophilic strain

| Name                              | PMDB Accession No. | C-score | Exp. TM-Score | Exp. RMSD | No. of decoys | Cluster density |
|-----------------------------------|--------------------|---------|---------------|-----------|---------------|-----------------|
| <i>Methylosinus trichosporium</i> | PM0077505          | 1.75    | 0.96+-0.05    | 1.8+-1.5  | 12600         | 1.2500          |
| <i>Hyphomicrobium zavarzinii</i>  | PM0077506          | 1.75    | 0.96+-0.05    | 1.8+-1.5  | 12600         | 1.2500          |
| <i>Methylobacterium podarium</i>  | PM0077507          | 1.76    | 0.96+-0.05    | 1.8+-1.5  | 12600         | 1.2500          |

**Table 4:** putative functional site residues of Methylophilic strain

| Name                              | Putative functional site residues                                                                           |
|-----------------------------------|-------------------------------------------------------------------------------------------------------------|
| <i>Methylosinus trichosporium</i> | GLY92, ILE93, SER106, ALA107, ASN108, LYS109, VAL114, LYS118, GLN119, VAL120, LEU122.                       |
| <i>Hyphomicrobium zavarzinii</i>  | ILE94, SER107, ALA108, ASN109, LYS110, ASP113, VAL115, ASN116, PHE118, LYS1219, SER120, VAL121, LEU123      |
| <i>Methylobacterium podarium</i>  | ASN91, GLY92, ILE93, SER106, ALA107, ASP108, LYS109, VAL114, PHE117, LYS118, THR119, VAL120, ASP121, LEU122 |
